# Supplementary material for: Pharmacological Thromboprophylaxis in People with Hemophilia Experiencing Orthopedic Surgery: What Does the Literature Say in 2023?
Source: MDPI journal article supplement (doi:10.3390/jcm12175574), 2023-08-26
Supplement: s1 [file s1]

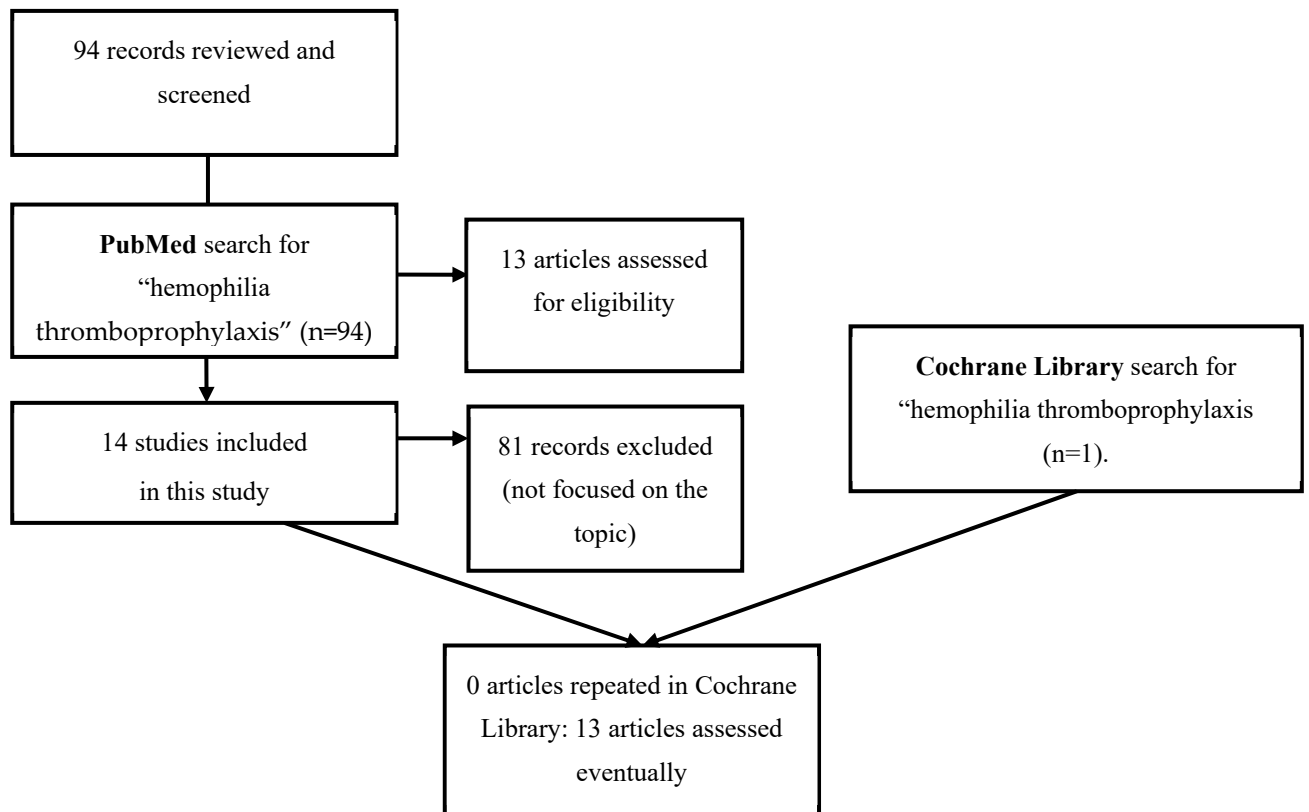

**Figure S1.** Flow chart of the search strategy performed regarding the role of pharmacological thromboprophylaxis after orthopedic surgery in people with hemophilia (PWH).
